# Supplementary material for: Gli3 acts as a repressor downstream of Ihh in regulating two distinct steps of chondrocyte differentiation
Source: Oxford University Press journal article supplement (doi:10.1242/dev.02097), 2005-11-10
Supplement: dev02097supptable1.pdf [file dev02097supptable1.pdf]

**Table S1. Measurements of distances and expression domains of proliferating chondrocytes**

| <b>A</b>                   |                | Total length in cm (relative units)* |                 |                |                            | % Length related to radius |                |               |
|----------------------------|----------------|--------------------------------------|-----------------|----------------|----------------------------|----------------------------|----------------|---------------|
|                            | Limb number    | Length of radius                     | Ihh             | PTHrP          | Ihh-PTHrP                  | %Ihh                       | %PTHrP         | %Ihh-PTHrP    |
| WT                         | 1              | 14.17                                | 3.25            | 1.20           | 2.05                       | 22.94                      | 8.47           | 14.46         |
|                            | 2              | 14.25                                | 3.10            | 1.25           | 1.85                       | 21.75                      | 8.77           | 12.98         |
|                            | 3              | 14.40                                | 3.20            | 1.50           | 1.7                        | 22.22                      | 10.42          | 11.81         |
|                            | 4              | 14.10                                | 3.20            | 1.35           | 1.85                       | 22.70                      | 9.57           | 13.12         |
|                            | 5              | 14.10                                | 3.35            | 1.55           | 1.8                        | 23.76                      | 10.99          | 12.77         |
|                            | 6              | 14.70                                | 3.25            | 1.40           | 1.85                       | 22.11                      | 9.52           | 12.59         |
|                            | average        | 14.29                                | 3.23            | 1.38           | 1.9                        |                            |                |               |
| <i>Gli3</i> <sup>-/-</sup> | 1              | 12.60                                | 2.80            | 0.90           | 1.9                        | 22.22                      | 7.14           | 15.08         |
|                            | 2              | 13.05                                | 2.80            | 1.00           | 1.8                        | 21.46                      | 7.66           | 13.79         |
|                            | 3              | 12.90                                | 2.60            | 0.95           | 1.65                       | 20.16                      | 7.36           | 12.79         |
|                            | 4              | 13.50                                | 2.55            | 0.95           | 1.6                        | 18.89                      | 7.04           | 11.85         |
|                            | 5              | 12.75                                | 2.85            | 0.95           | 1.9                        | 22.35                      | 7.45           | 14.90         |
|                            | 6              | 14.40                                | 2.90            | 1.10           | 1.8                        | 20.14                      | 7.64           | 12.50         |
|                            | average        | 13.20                                | 2.75            | 0.98           | 1.8                        |                            |                |               |
|                            | <i>t</i> -test | <i>0.0036</i>                        | <i>0.00003</i>  | <i>0.00008</i> | <i>0.30403</i>             | <i>0.02174</i>             | <i>0.00025</i> | <i>0.4314</i> |
| <b>B</b>                   |                | Total length in cm (relative units)* |                 |                | % Length related to radius |                            |                |               |
|                            | Limb number    | Length of radius                     | Fgfr1           | Fgfr3          | %Fgfr1                     | %Fgfr3                     |                |               |
| WT                         | 1              | 13.2                                 | 1.5             | 2.45           | 11.36                      | 18.56                      |                |               |
|                            | 2              | 13.95                                | 1.35            | 2.75           | 9.67                       | 19.71                      |                |               |
|                            | 3              | 13.8                                 | 1.25            | 2.85           | 9.06                       | 20.65                      |                |               |
|                            | 4              | 13.875                               | 1.45            | 2.9            | 10.45                      | 20.90                      |                |               |
|                            | 5              | 15                                   | 1.75            | 3              | 11.66                      | 20.00                      |                |               |
|                            | average        | 13.96                                | 1.46            | 2.79           |                            |                            |                |               |
| <i>Gli3</i> <sup>-/-</sup> | 1              | 11.4                                 | 0.7             | 2.1            | 6.14                       | 18.42                      |                |               |
|                            | 2              | 12                                   | 0.75            | 2.4            | 6.25                       | 20                         |                |               |
|                            | 3              | 12.075                               | 0.85            | 2.65           | 7.04                       | 21.95                      |                |               |
|                            | 4              | 13.05                                | 1               | 2.7            | 7.66                       | 20.69                      |                |               |
|                            | 5              | 13.125                               | 0.8             | 2.9            | 6.09                       | 22.09                      |                |               |
|                            | average        | 12.33                                | 0.82            | 2.55           |                            |                            |                |               |
|                            | <i>t</i> -test | <i>0.006</i>                         | <i>0.0002</i>   | <i>0.18834</i> | <i>0.00018</i>             | <i>0.4247</i>              |                |               |
| <b>C</b>                   |                | Total length in cm (relative units)* |                 |                |                            |                            |                |               |
|                            | Limb number    | Fgfr1                                | Fgfr3           |                |                            |                            |                |               |
| WT                         | 1              | 1.4                                  | 2.95            |                |                            |                            |                |               |
|                            | 2              | 1.4                                  | 2.95            |                |                            |                            |                |               |
|                            | 3              | 1.4                                  | 2.75            |                |                            |                            |                |               |
|                            | average        | 1.4                                  | 2.88            |                |                            |                            |                |               |
| <i>Col2a1-Ihh</i>          | 1              | 1.1                                  | 3.35            |                |                            |                            |                |               |
|                            | 2              | 1.05                                 | 3.6             |                |                            |                            |                |               |
|                            | 3              | 1.2                                  | 3.75            |                |                            |                            |                |               |
|                            | average        | 1.12                                 | 3.57            |                |                            |                            |                |               |
|                            | <i>t</i> -test | <i>0.003016</i>                      | <i>0.007054</i> |                |                            |                            |                |               |

\*Average measurements of two sections per limb.
